# Supplementary material
Source: publisher site journal article supplement (https://www.dovepress.com/article/540048)
Supplement: Supplementary file 1 [file 540048%20Revised%20%20Supplemental%20Material.pdf]

## Supplemental Material

**Supplemental Figure 1:** Distribution of propensity scores by medication type.

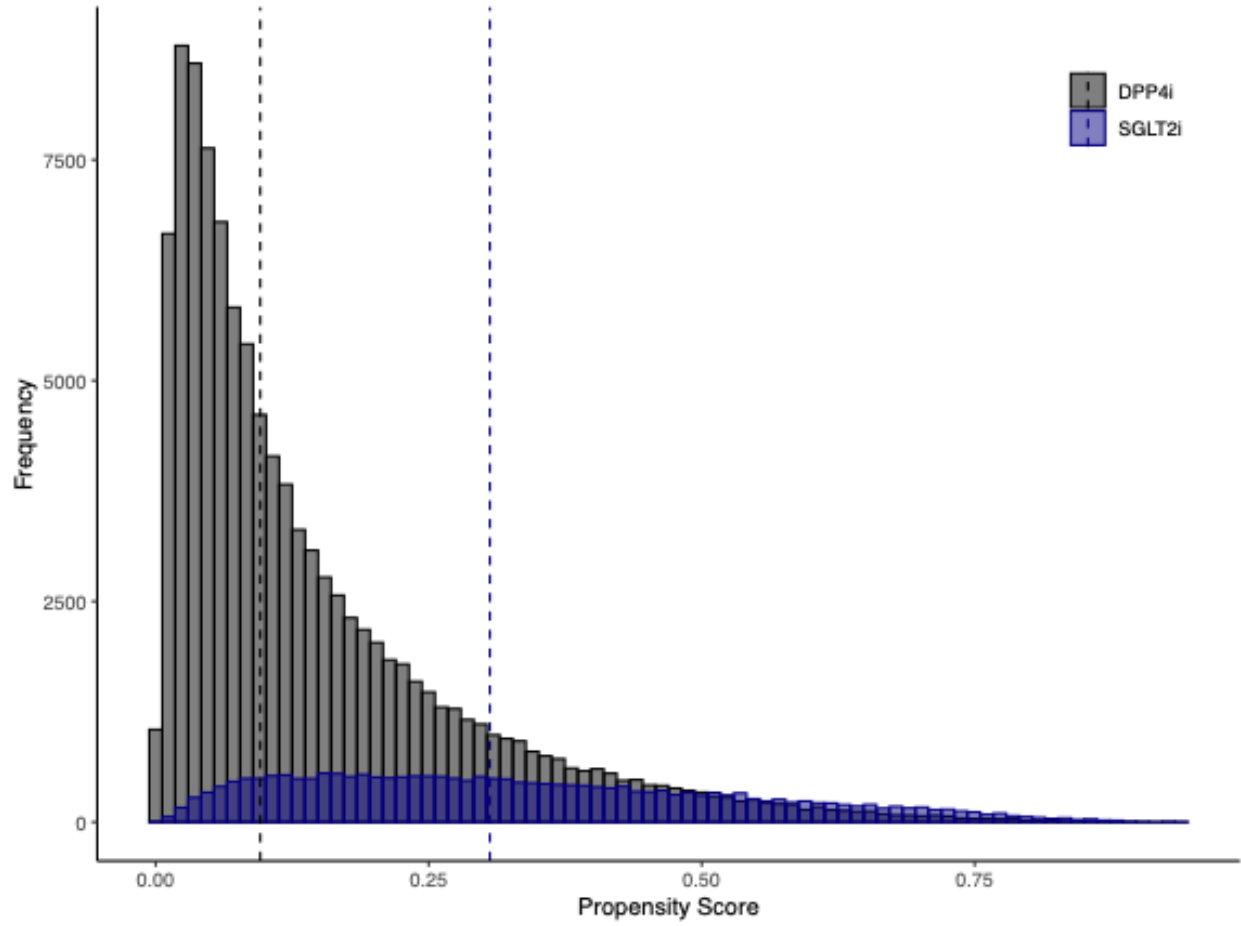

**Supplemental Figure 2:** The prior distributions for the SGLT2i coefficient,  $\beta_1$ , for the three different Bayesian models (No CVD, CVD, Uninformative). The blue, yellow and black vertical dashed lines denote means of the normal priors for the CVD, No CVD, and Uninformative Priors, respectively.

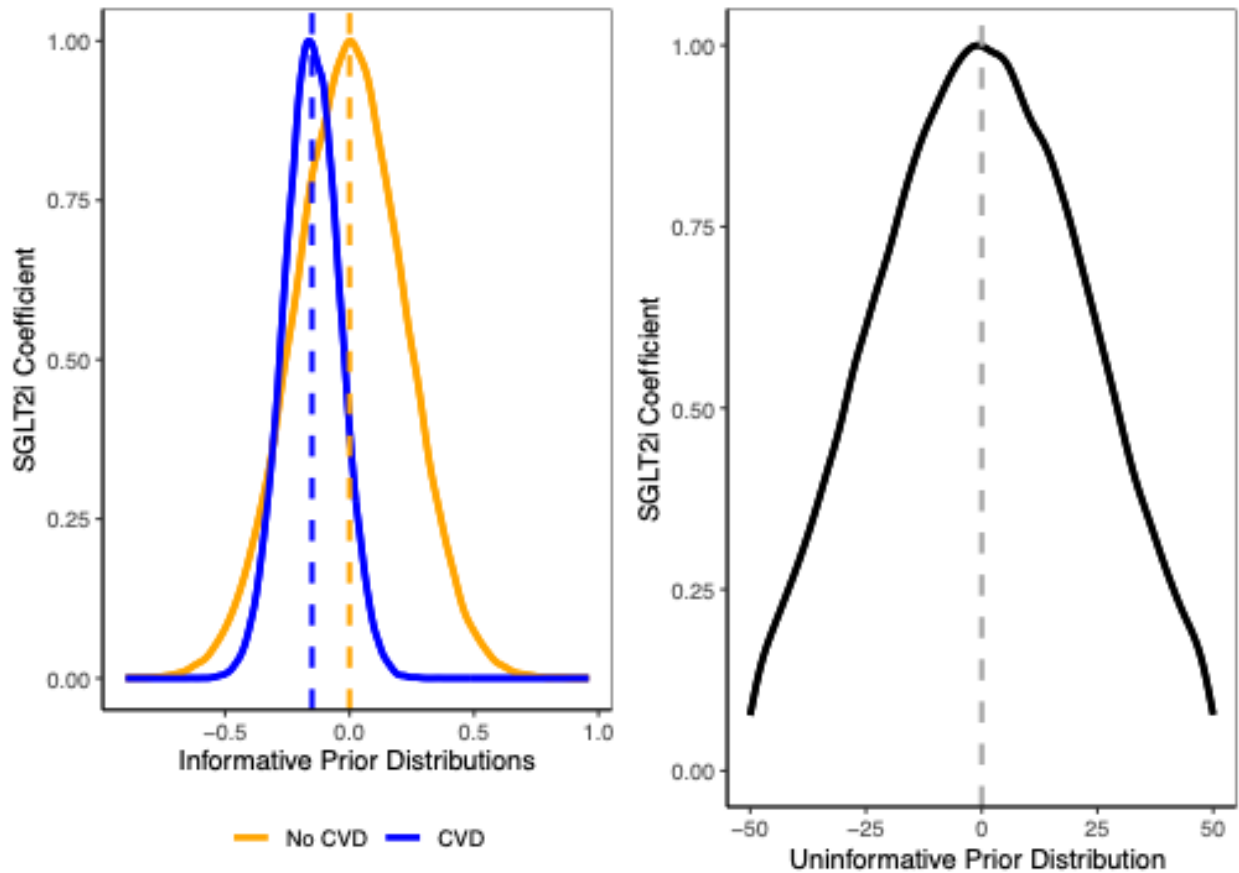

**Note:** The Uninformative Prior appears as a flat line near zero when plotted with the No CVD and CVD Priors, so it is plotted separately.
